# Supplementary material for: Using text-mined trait data to test for cooperate-and-radiate co-evolution between ants and plants
Source: PubMed Central journal article supplement (PMC6776258; doi:10.1371/journal.pcbi.1007323), 2019-10-03

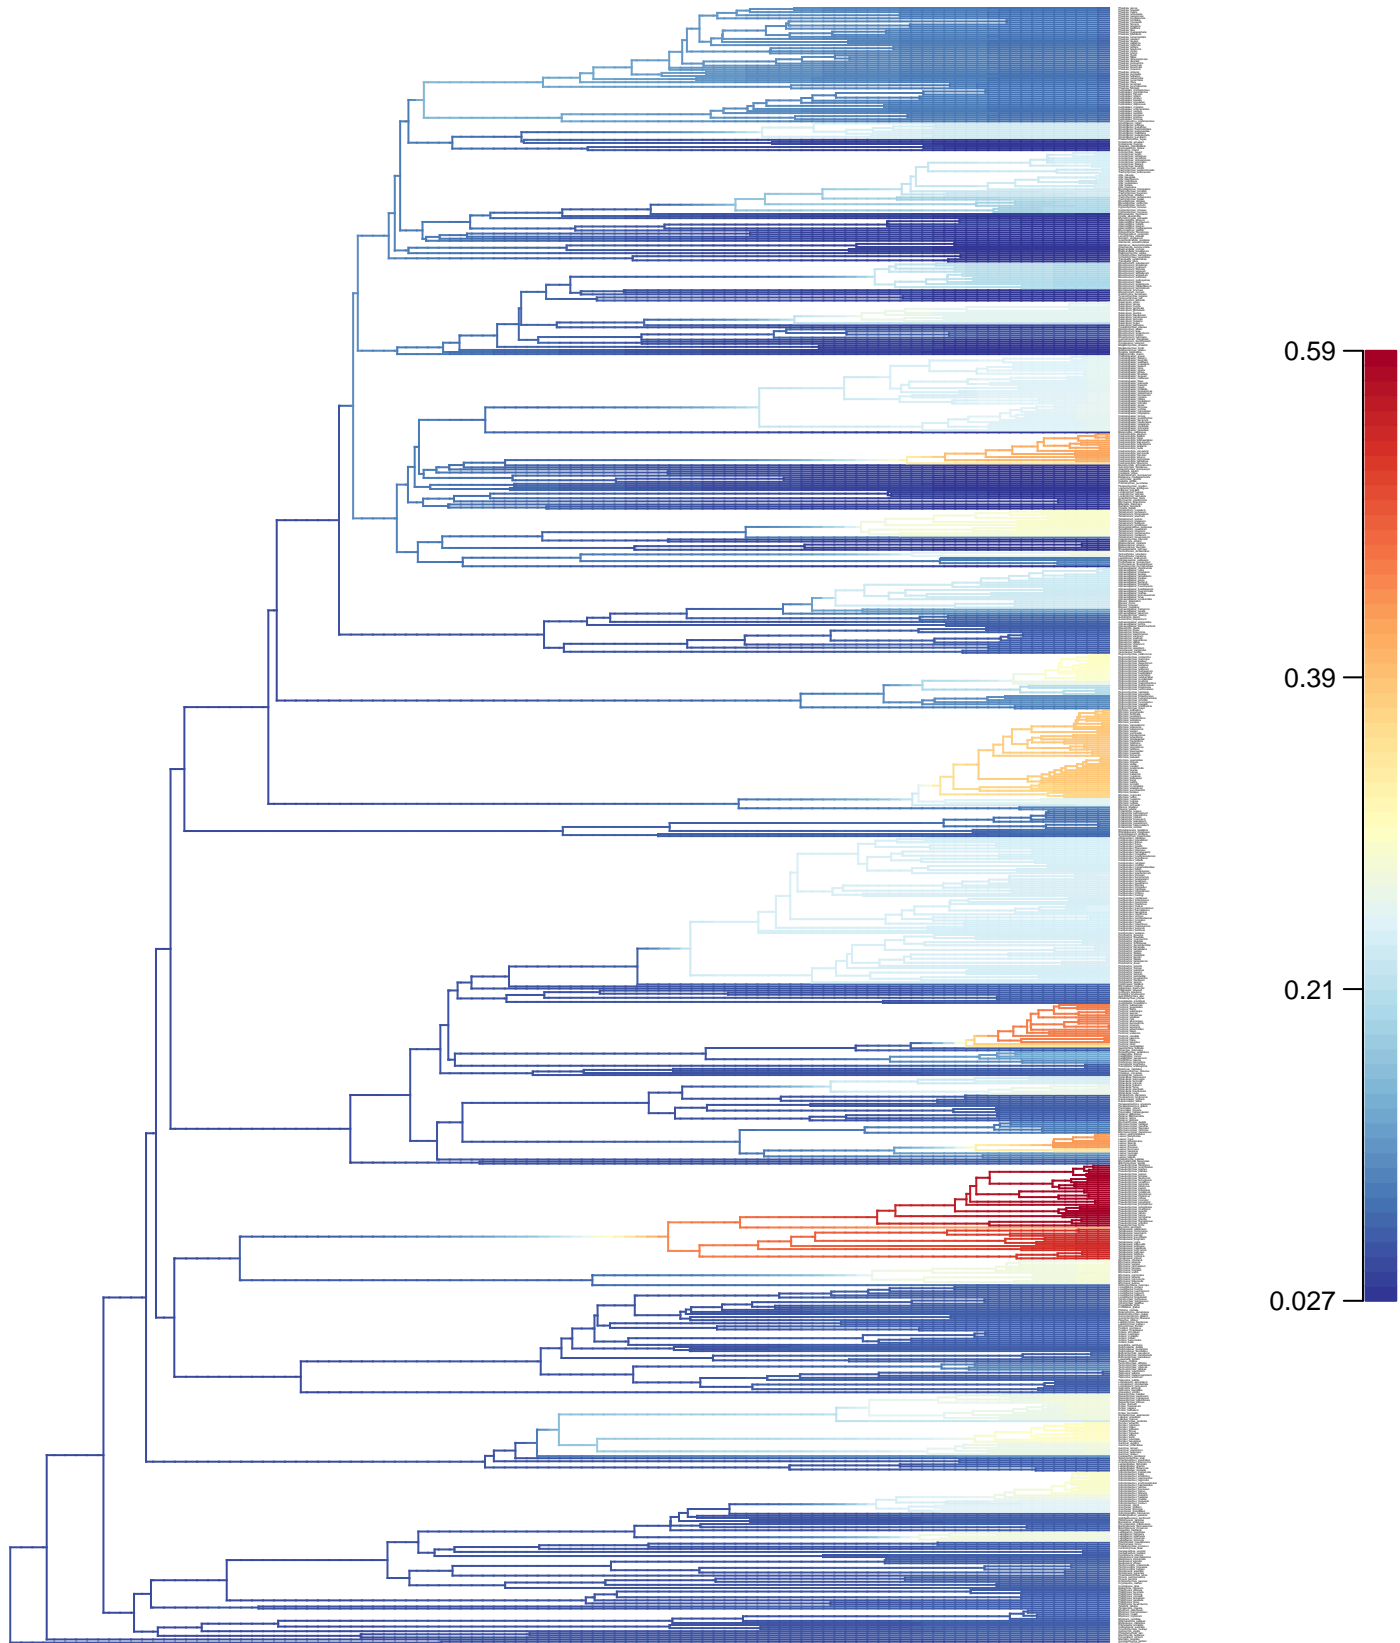

Supplement: pcbi.1007323.s004.pdf [file pcbi.1007323.s004.pdf]
